# Supplementary material for: The Hypolipidemic Characteristics of a Methanol Extract of Fermented Green Tea and Spore of Eurotium cristatum SXHBTBU1934 in Golden Hamsters
Source: MDPI journal article supplement (doi:10.3390/nu15061329), 2023-03-08
Supplement: s1 [file s1]

## **SUPPLEMENTARY MATERIAL**

# **The Hypolipidemic Characteristics of a Methanol Extract of Fermented Green Tea and Spore of *Eurotium cristatum* SXHBTBU1934 in Golden Hamsters**

**Fuhang Song <sup>1,\*</sup>, Kai Zhang <sup>1</sup>, Jinpeng Yang <sup>2</sup>, Annette S. Wilson <sup>3</sup>, Caixia Chen <sup>3</sup> and Xiuli Xu <sup>2,\*</sup>**

## Table of Contents

|                                                                                                           |   |
|-----------------------------------------------------------------------------------------------------------|---|
| <b>Figure S1.</b> HRESIMS spectrum for <b>1</b> .....                                                     | 3 |
| <b>Figure S2.</b> $^1\text{H}$ NMR spectrum (500 MHz, $\text{CDCl}_3$ ) of <b>1</b> .....                 | 3 |
| <b>Figure S3.</b> $^{13}\text{C}$ NMR spectrum (125 MHz, $\text{CDCl}_3$ ) of <b>1</b> .....              | 4 |
| <b>Figure S4.</b> HSQC spectrum (500 MHz, $\text{CDCl}_3$ ) of <b>1</b> .....                             | 4 |
| <b>Figure S5.</b> $^1\text{H}$ - $^1\text{H}$ COSY spectrum (500 MHz, $\text{CDCl}_3$ ) of <b>1</b> ..... | 5 |
| <b>Figure S6.</b> HMBC spectrum (500 MHz, $\text{CDCl}_3$ ) of <b>1</b> .....                             | 5 |

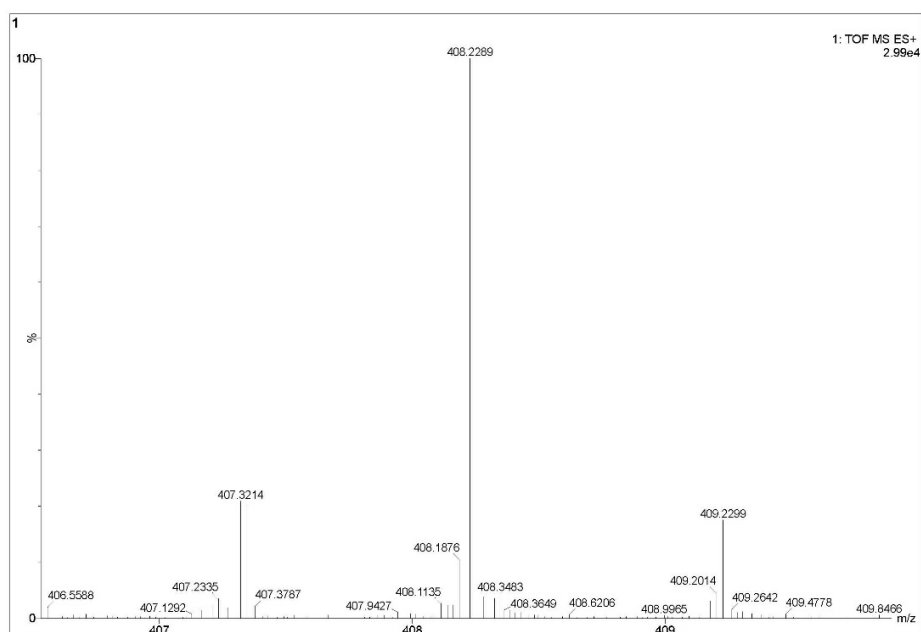

**Figure S1.** HRESIMS spectrum for **1**.

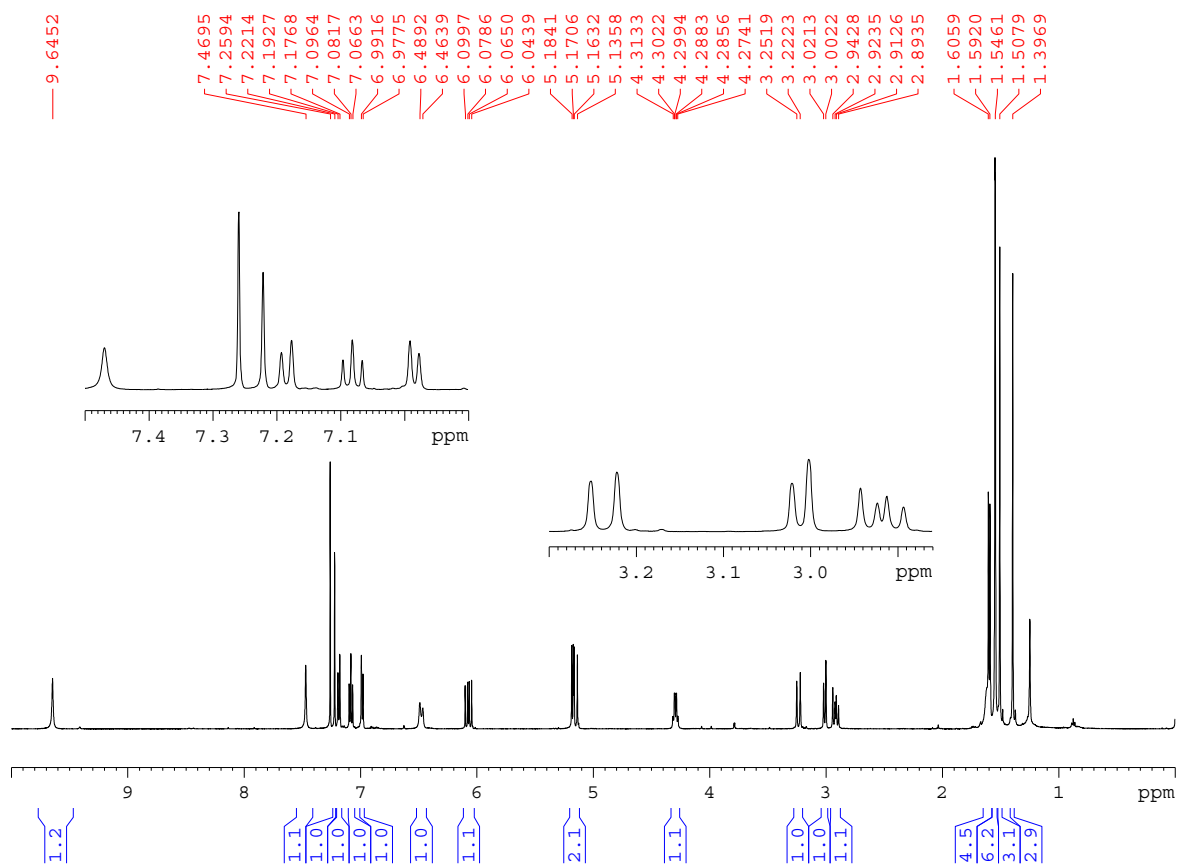

**Figure S2.**  $^1\text{H}$  NMR spectrum (500 MHz,  $\text{CDCl}_3$ ) of **1**.

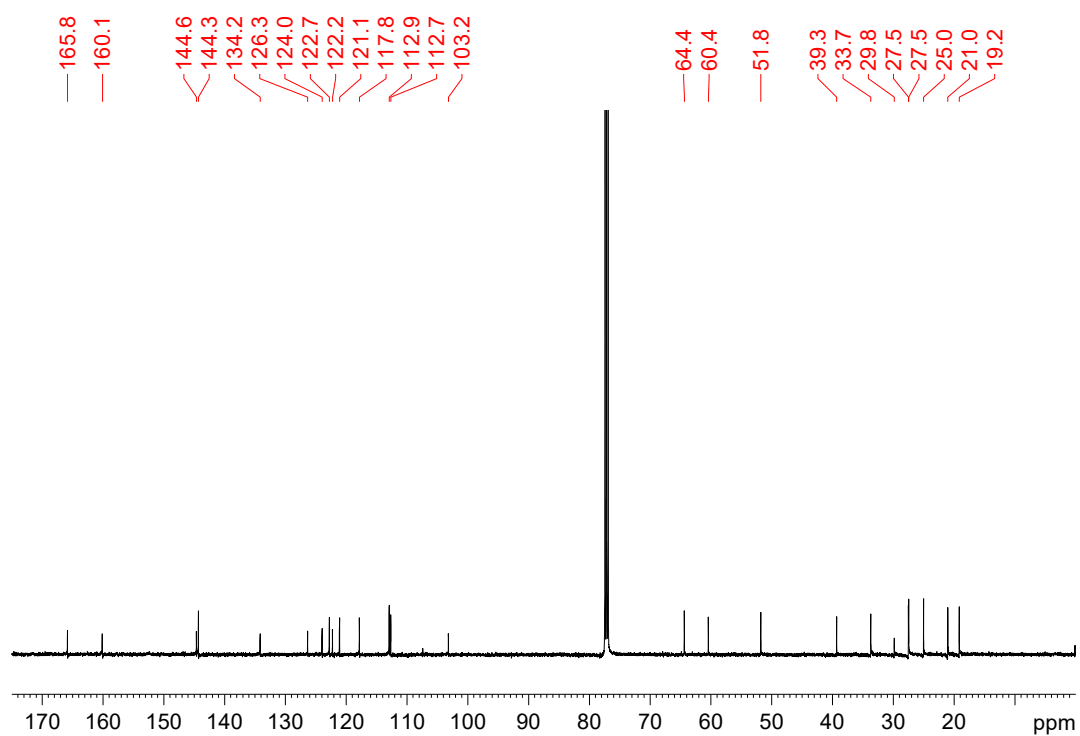

**Figure S3.**  $^{13}\text{C}$  NMR spectrum (125 MHz,  $\text{CDCl}_3$ ) of **1**.

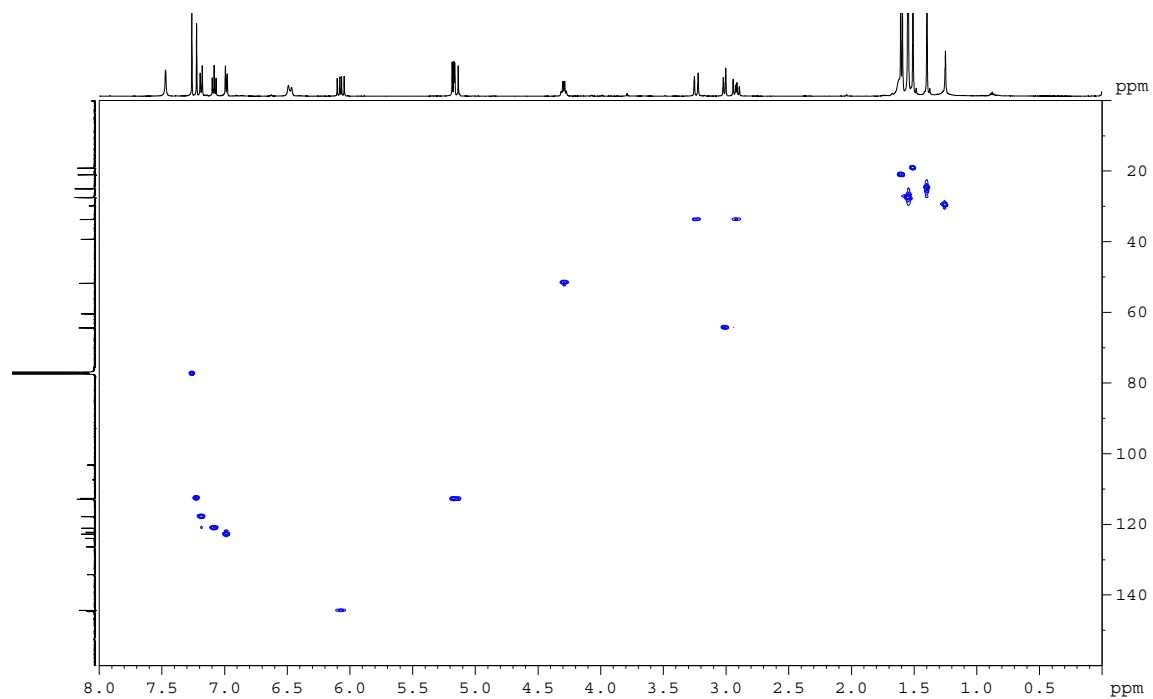

**Figure S4.** HSQC spectrum (500 MHz,  $\text{CDCl}_3$ ) of **1**.

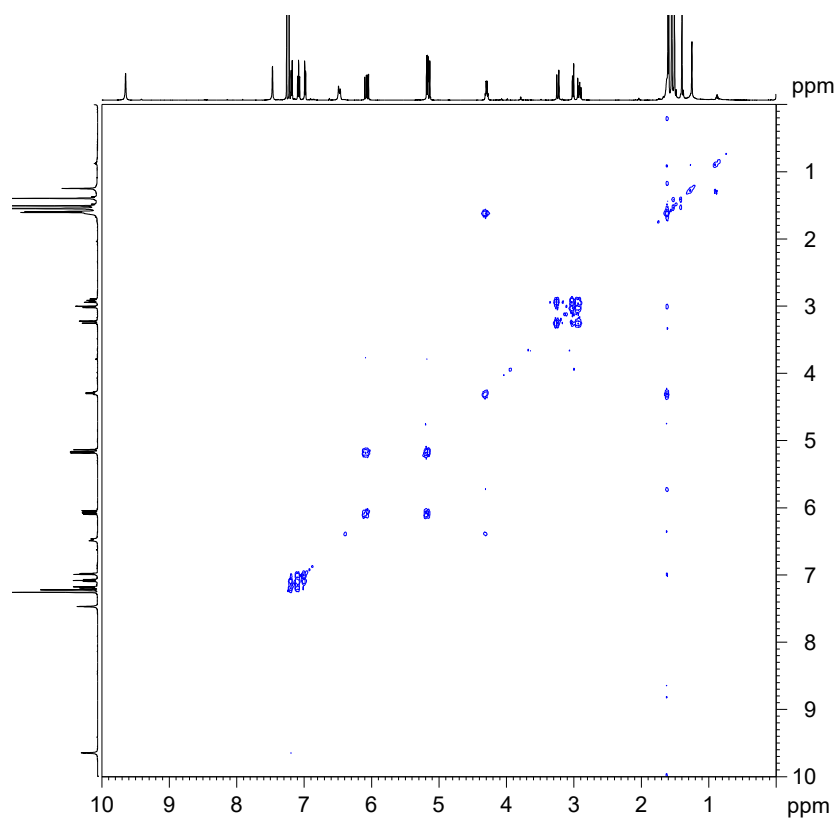

**Figure S5.**  $^1\text{H}$  -  $^1\text{H}$  COSY spectrum (500MHz,  $\text{CDCl}_3$ ) of **1**.

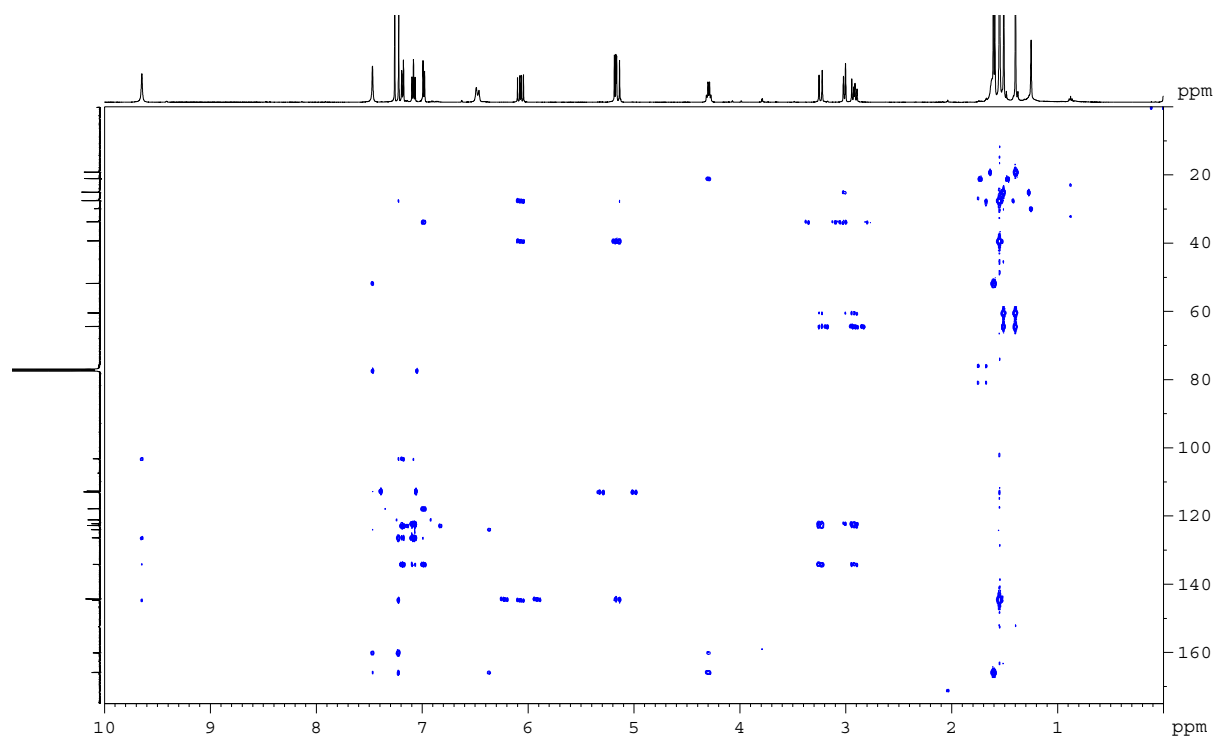

**Figure S6.** HMBC spectrum (500 MHz,  $\text{CDCl}_3$ ) of **1**.
